# Supplementary material
Source: Springer Nature journal article supplement (https://www.springermedizin.de/resource/supplementary/13046_2011_513_MOESM4_ESM.pdf/9662402)

**GGA (Glycine)**

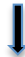

TTACCTGGACTCTGGAAATCCATTCTGGTG

HuH-7

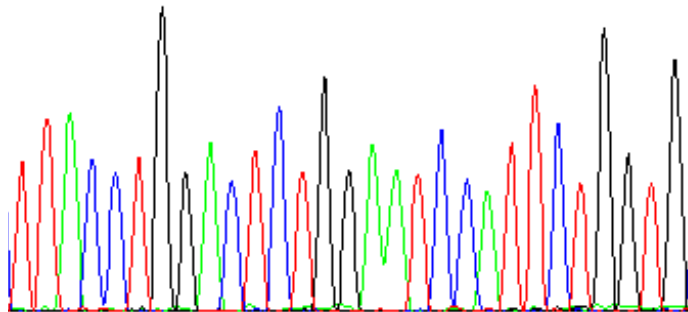

HuH-6

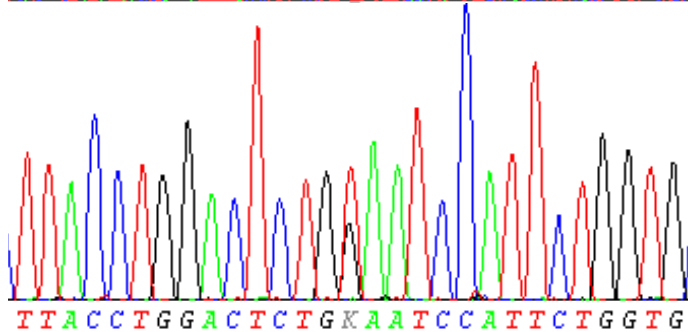

**GTA (Valine)**

Supplement: MOESM4 [file 9662402]
